# Supplementary material for: The Effect of Paracrine Factors Released by Irradiated Peripheral Blood Mononuclear Cells on Neutrophil Extracellular Trap Formation
Source: MDPI journal article supplement (doi:10.3390/antiox11081559), 2022-08-11
Supplement: s1 [file s1]

## Supplementary Figures

### The effect of paracrine factors released by irradiated peripheral blood mononuclear cells on neutrophil extracellular trap formation

Katharina Klas,<sup>1,2</sup> Anna S Ondracek,<sup>3</sup> Thomas M Hofbauer,<sup>3</sup> Andreas Mangold,<sup>3</sup> Karin Pfisterer<sup>4</sup>, Maria Laggner,<sup>1,2</sup> Dragan Copic,<sup>1,2</sup> Martin Direder,<sup>1,2</sup> Daniel Bormann,<sup>1,2</sup> Hendrik Jan Ankersmit,<sup>1,2§</sup> Michael Mildner<sup>4 § \*</sup>

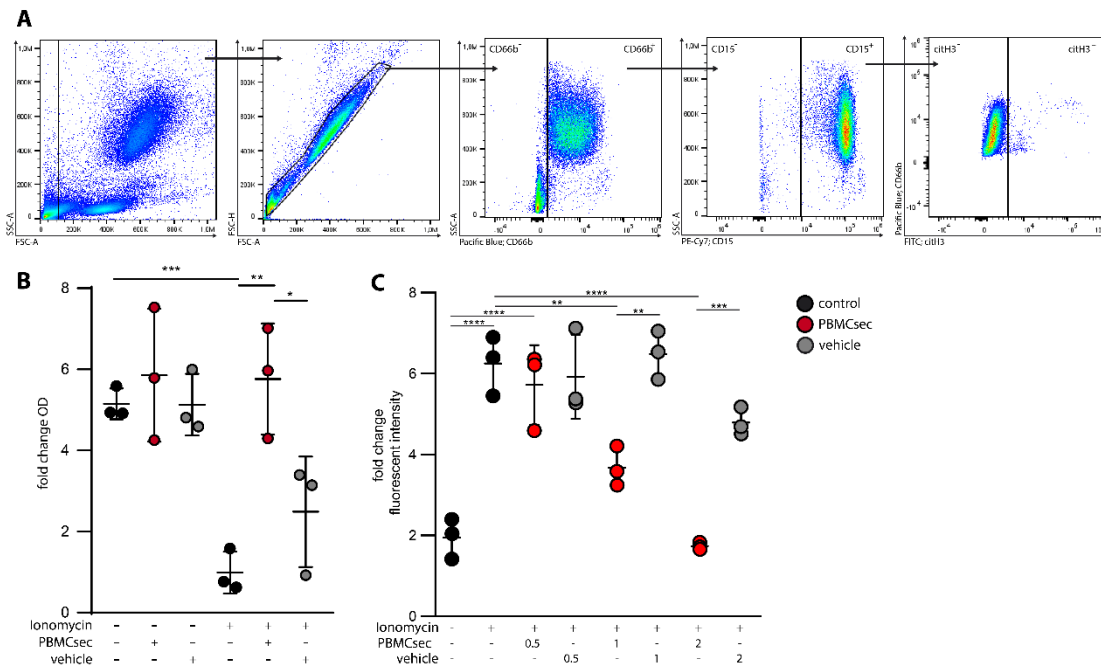

**Figure S1 PBMCsec improves neutrophil metabolic activity and inhibits NETosis in a dose-dependent manner**

(A) Flow cytometry gating strategy for erythrocyte lysed blood samples is shown. (B) Metabolic activity of neutrophils was measured using an absorbance based assay (EZ4U). Vehicle treated neutrophils did not show altered metabolic activity compared to untreated control samples. PBMCsec treatment appeared to partially promote metabolic activity of non-activated neutrophils. IM treatment resulted in a significant reduction of metabolic activity of neutrophils which was abolished by PBMCsec treatment. Vehicle treatment could not restore homeostatic metabolic activity in IM-activated neutrophils. C) Extracellular DNA content was measured using cytotox staining of neutrophils after pre-treatment with PBMCsec or vehicle in a dose dependent manner. Data are represented as mean  $\pm$  SD, one-way ANOVA and Sidak's multiple comparisons test.

\*p<0.0332, \*\*p<0.0021, \*\*\*p<0.0002

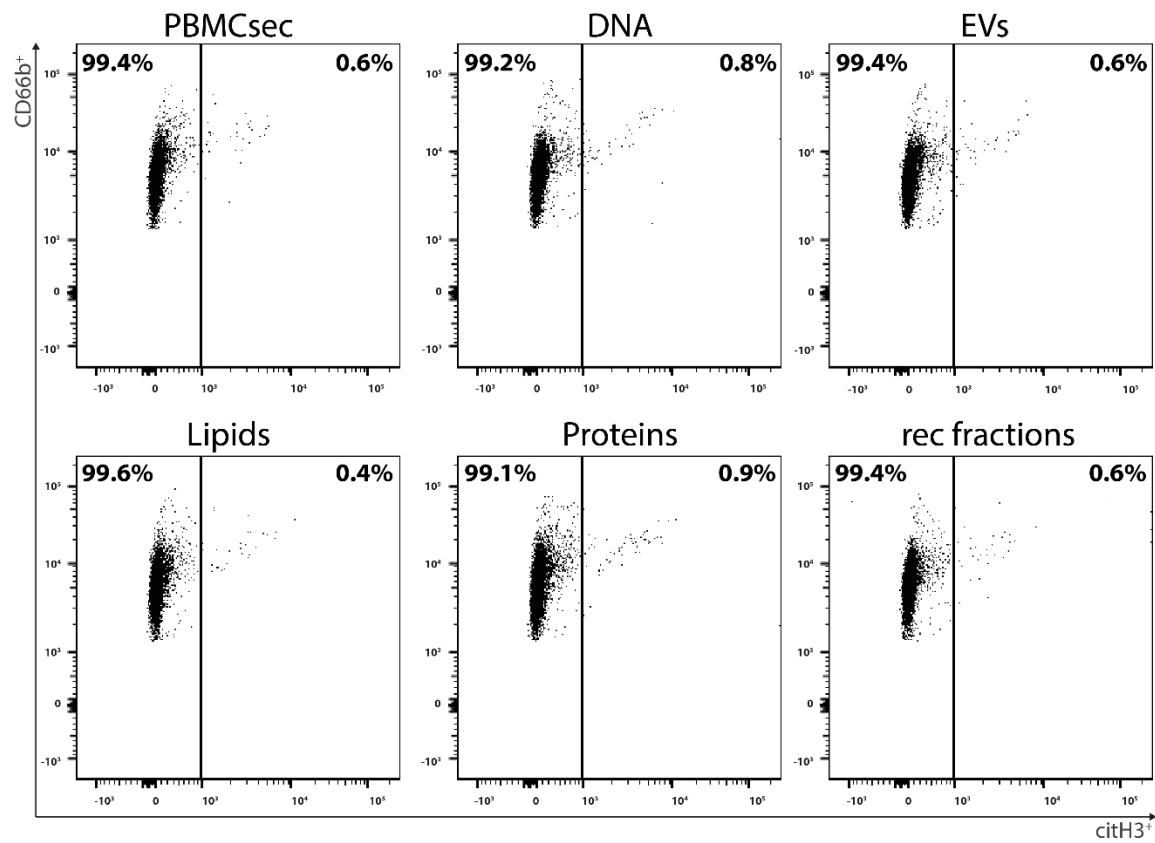

***Figure S2 Flow cytometric analysis of spontaneous NET formation***

Flow cytometric analysis of untreated control neutrophils and neutrophils treated with PBMCsec derived substance classes in absence of an activating stimulus is shown. Neutrophils were identified as CD66b<sup>+</sup>CD15<sup>+</sup> cells and NET formation was characterized by additional citH3<sup>+</sup> signal. n = 3, one representative experiment is shown.

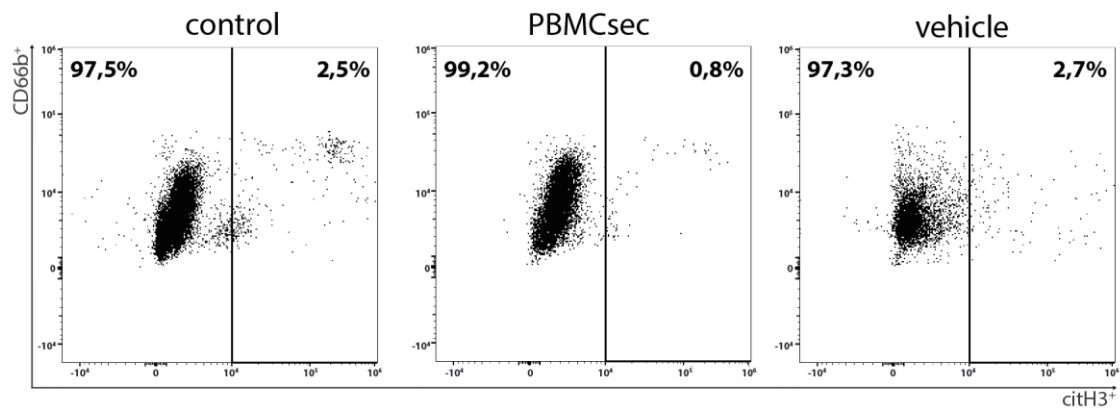

***Figure S3 Flow cytometric analysis of unstimulated neutrophils***

Flow cytometric analysis of untreated control neutrophils and neutrophils treated with PBMCsec or vehicle in absence of an activating stimulus after two hours is shown. Neutrophils were identified as CD66b<sup>+</sup>CD15<sup>+</sup> cells and NET formation was characterized by additional citH3<sup>+</sup> signal. n = 3, one representative experiment is shown.

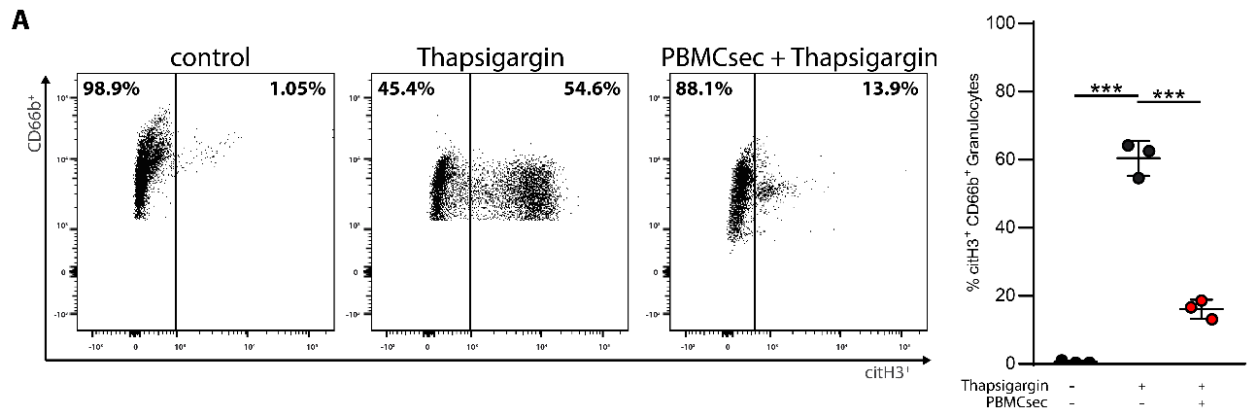

**Figure S4 PBMCsec inhibits Thapsigargin-induced NETosis**

Neutrophils were analysed using flow cytometry and identified by CD66b<sup>+</sup>CD15<sup>+</sup> signal. NETosis was identified by citH3<sup>+</sup> positive signal. Untreated control samples were compared to Thapsigargin-activated cells as well as Thapsigargin-activated and PBMCsec-treated cells. Data are represented as mean ± SD, one-way ANOVA and Sidak's multiple comparisons test. \*\*\*p<0.0002

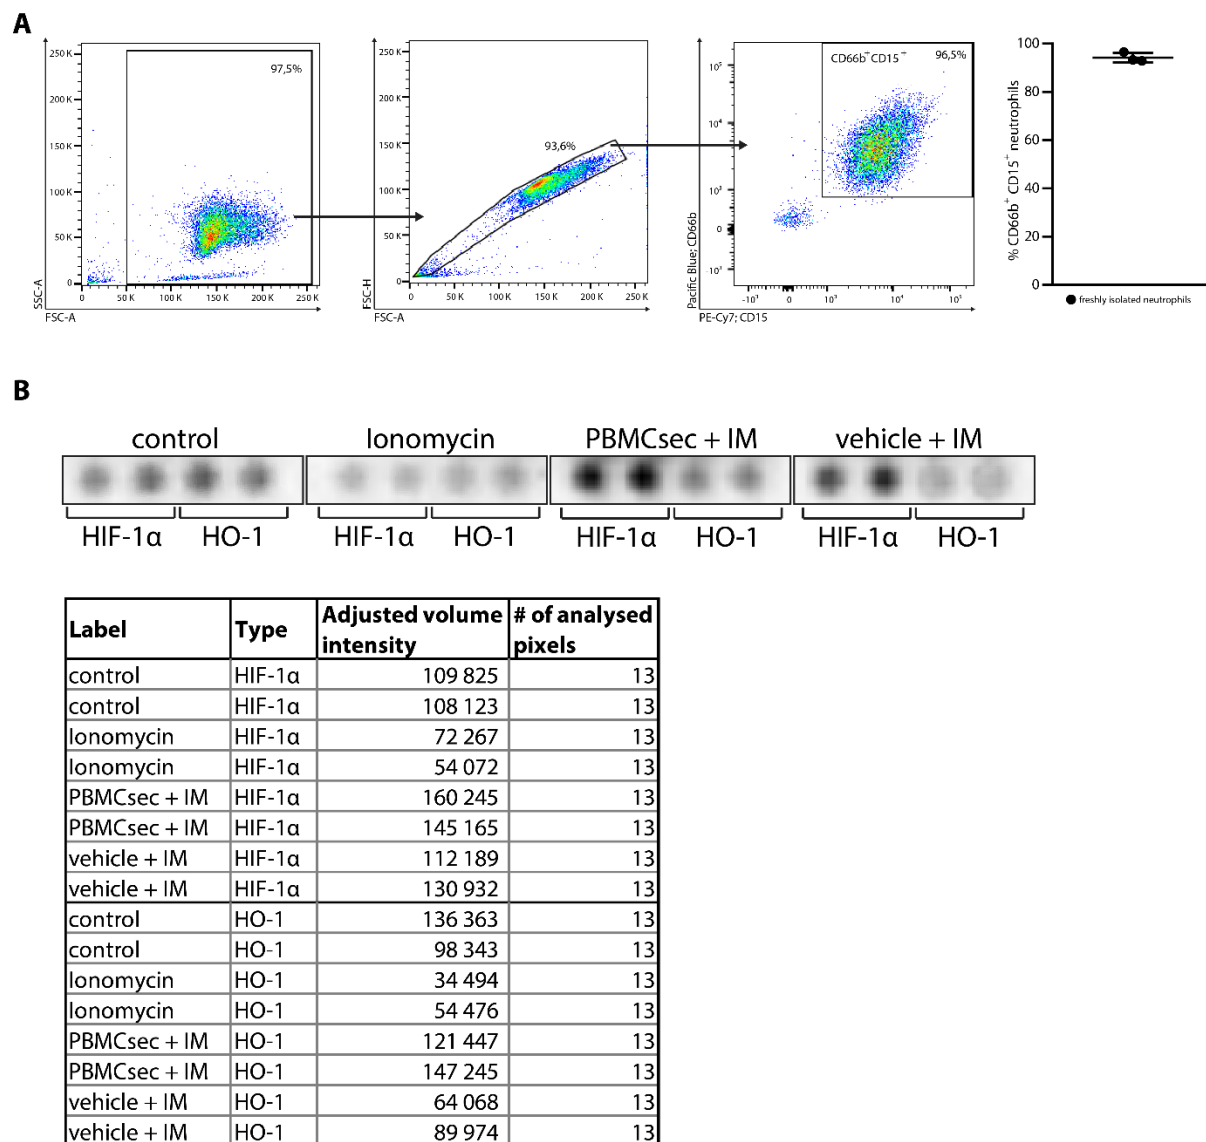

**Figure S5 Gating strategy and purity of isolated neutrophils**

A) Flow cytometry gating strategy for the analysis of neutrophil purity after magnetic bead isolation is shown. Neutrophil purity was assessed by the percentage of CD66b<sup>+</sup>CD15<sup>+</sup> cells and ranged from 92.9% to 96.5%. B) Analysed images of the proteome profiler of the protein levels of HO-1 and HIF-1α. Isolated neutrophils of four individual donors were stimulated with ionomycin and treated with PBMCsec or vehicle. Cell lysates of four individual donors and experiments were pooled. Raw analysis values are shown in the table below.

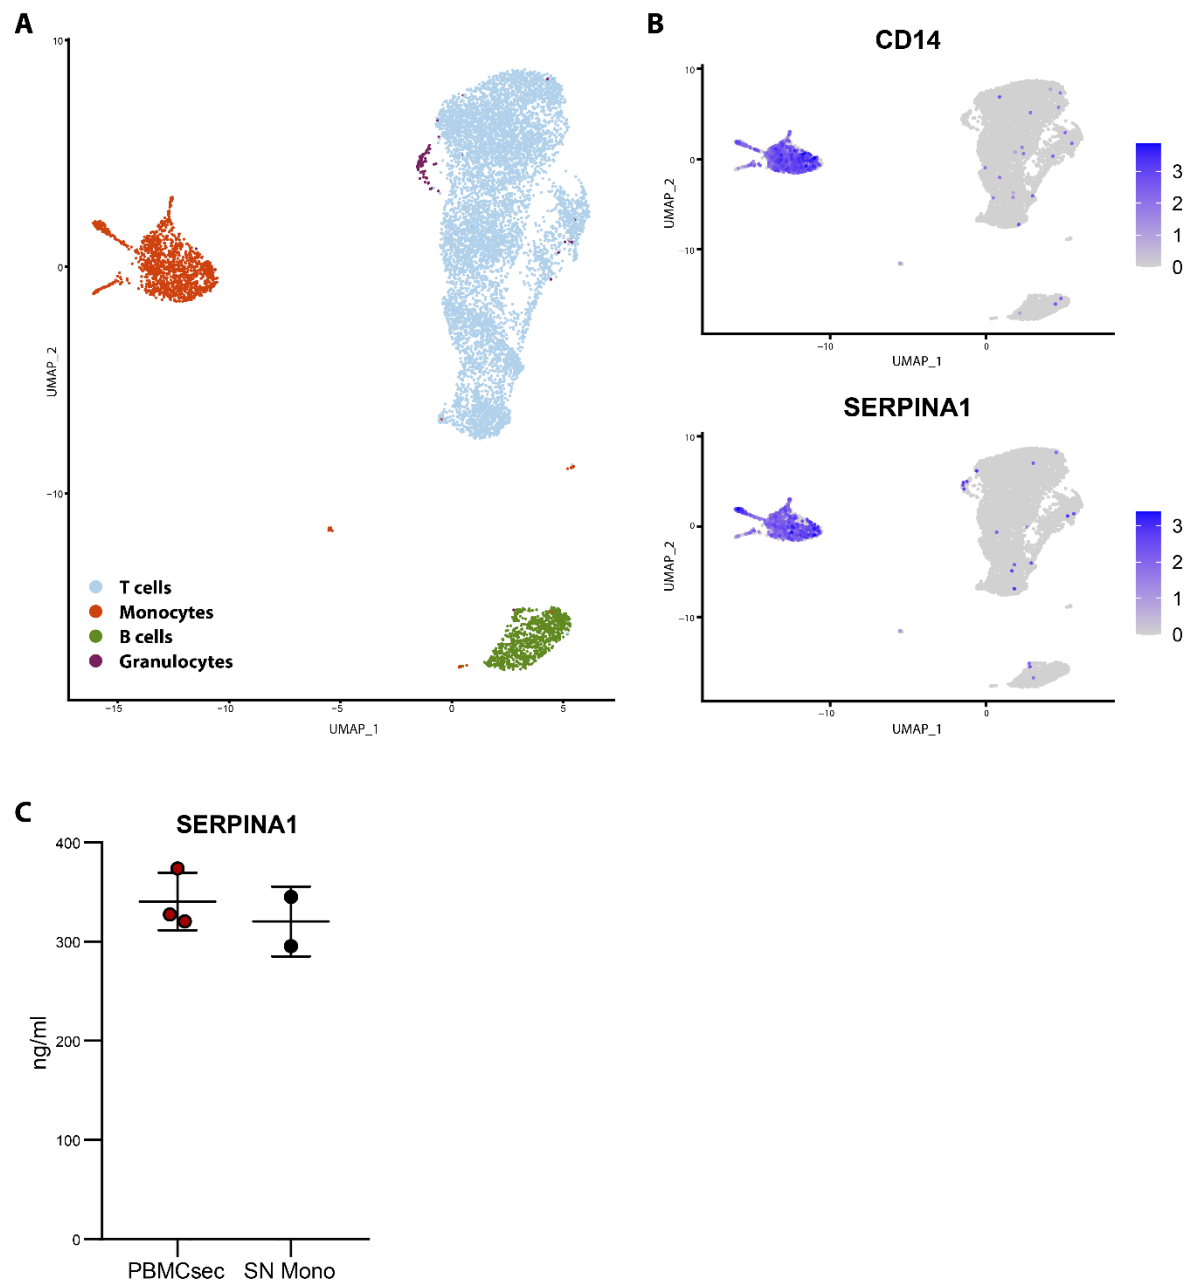

*Figure S6 SERPINA1 abundance in PBMCsec*

Single cell RNA sequencing analysis of erythrocyte lysed whole blood shows (A) UMAP cluster depiction of captured cell populations. (B) Monocyte cluster were identified by the expression of CD14. SERPINA1 expression was almost exclusively found in the CD14<sup>+</sup> monocyte cluster. (C) SERPINA1 concentration in PBMCsec was analysed using ELISA. Supernatants of monocytes (SN Mono), cultured for 24 hours, were used as positive controls.

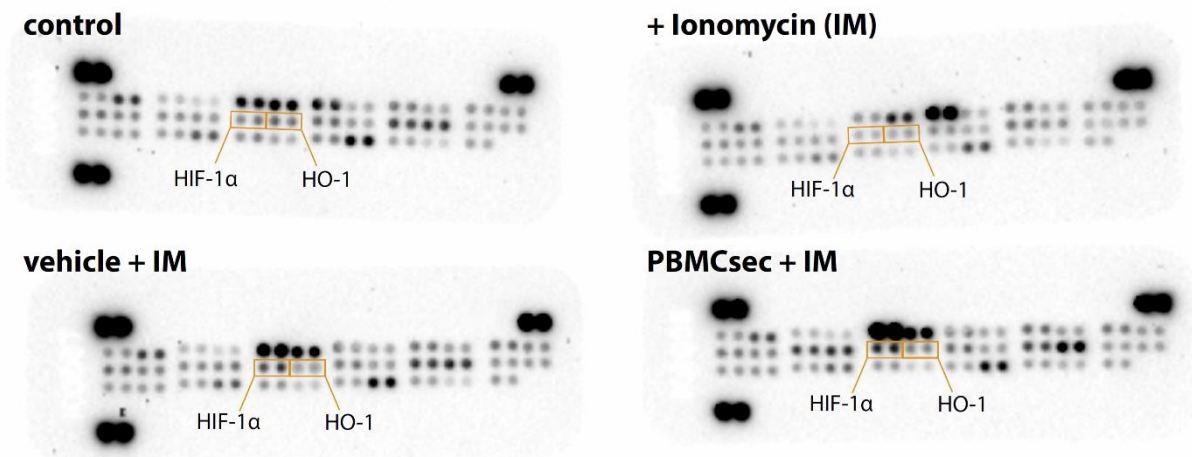

*Supplementary information: original blots from human apoptosis array kit (R&D proteome profiler)*

Lysates of four individually treated donor samples were pooled and applied to the membrane according to the manufacturer's instructions. All membranes were developed in parallel. Analysed spots are marked by rectangles and labelled.
